# Supplementary material for: Synthesis, X-ray crystal structures, magnetism, and DNA cleavage properties of copper(ii) complexes with 1,4-tpbd ligand
Source: Royal Society of Chemistry journal article supplement (doi:10.1039/b823472h), 2009-01-01
Supplement: b823472h.pdf [file b823472h.pdf]

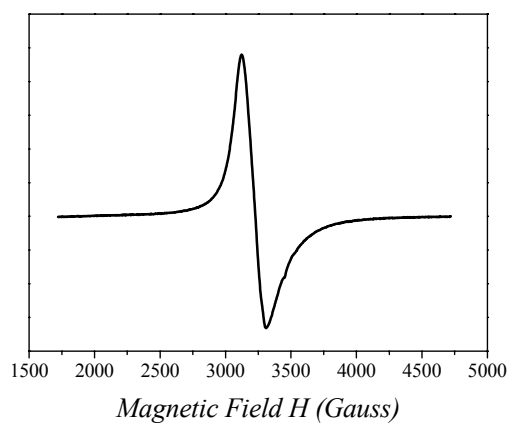

(1)

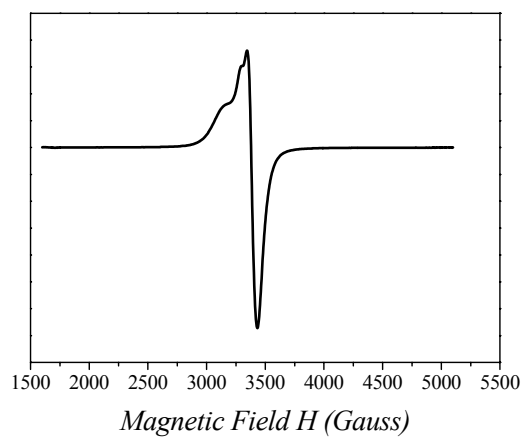

(2)

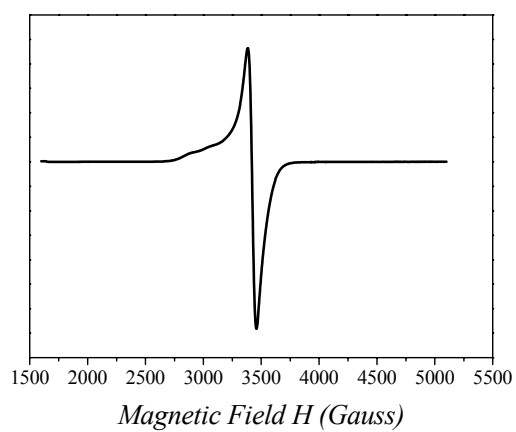

(4)

**Fig. 1S** X-Band ESR spectra of complexes **1**, **2**, and **4** in the solid state at room temperature

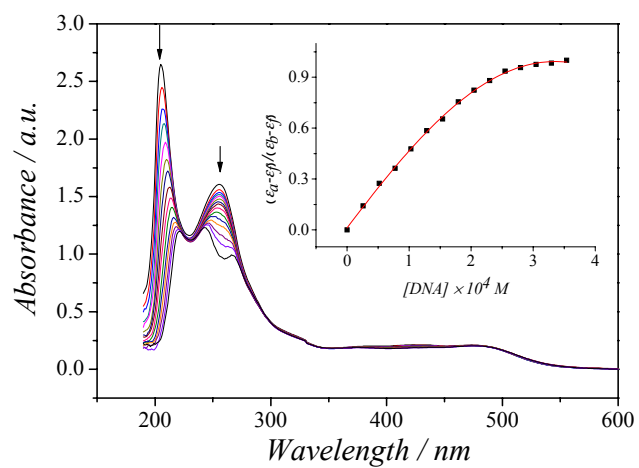

(1)

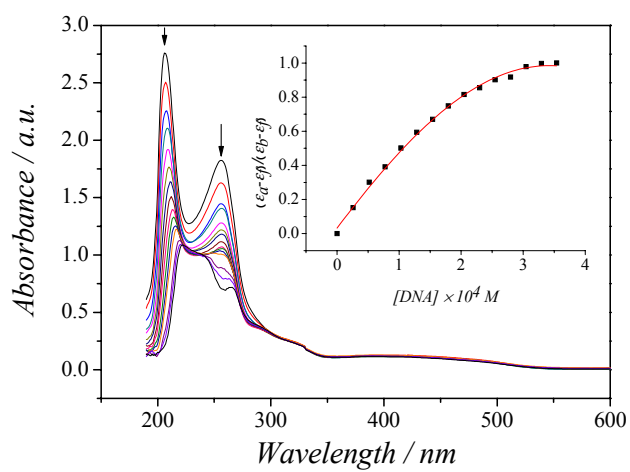

(2)

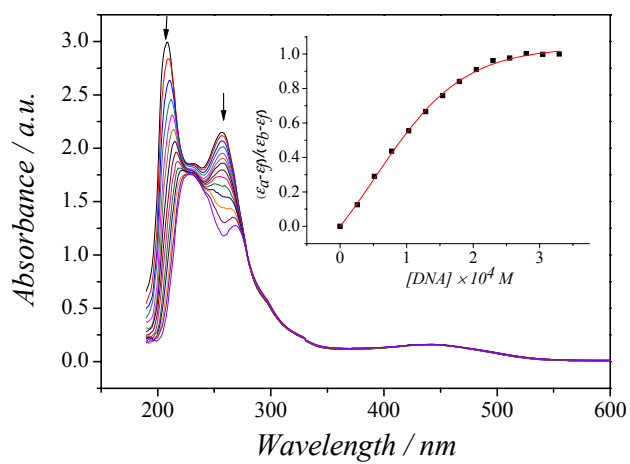

(3)

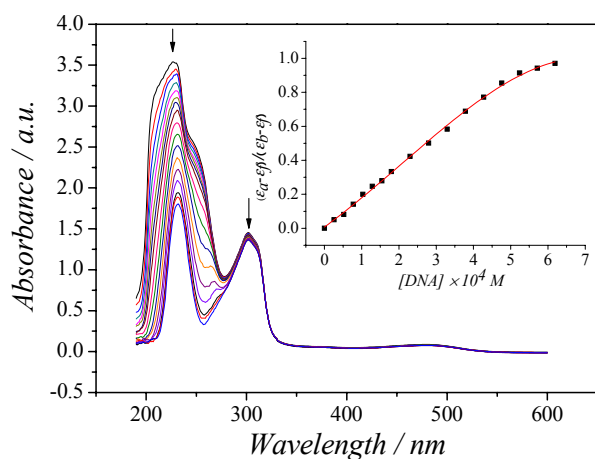

(4)

**Fig. 2S** Absorption spectra of  $3.85 \times 10^{-5}$  M complexes **1**, **2**, **3** and **4** in the presence of increasing amounts of CT-DNA at room temperature in Tris-HCl / NaCl buffer (pH = 7.2). Arrows indicate the change in absorbance upon increasing the DNA concentration. Insert: Plot of  $(\epsilon_a - \epsilon_f) / (\epsilon_b - \epsilon_f)$  versus [DNA] for the titration of DNA to Cu(II) complexes.

**Table 1S** Absorption spectral properties of copper (II) complexes bound to CT-DNA.

| complex                                                                                             |          | $\lambda_{\max}$<br>(nm) | change in<br>absorbance | $\Delta\epsilon$<br>(%) | red shift<br>(nm) |
|-----------------------------------------------------------------------------------------------------|----------|--------------------------|-------------------------|-------------------------|-------------------|
| [Cu(1,4-tpbd)Br <sub>2</sub> ]                                                                      | <b>1</b> | 205                      | hypochromism            | 55                      | 16                |
| [Cu <sub>2</sub> (1,4-tpbd)(H <sub>2</sub> O) <sub>4</sub> ] <sup>4+</sup>                          | <b>2</b> | 206                      | hypochromism            | 61                      | 16                |
| [Cu <sub>2</sub> (1,4-tpbd)(1,10-phen) <sub>2</sub> (DMF) <sub>2</sub> ] <sup>4+</sup>              | <b>3</b> | 208                      | hypochromism            | 41                      | 19                |
| [Cu <sub>2</sub> (1,4-tpbd)(2,2'-bpy) <sub>2</sub> (ClO <sub>4</sub> ) <sub>2</sub> ] <sup>2+</sup> | <b>4</b> | 227                      | hypochromism            | 49                      | 5                 |

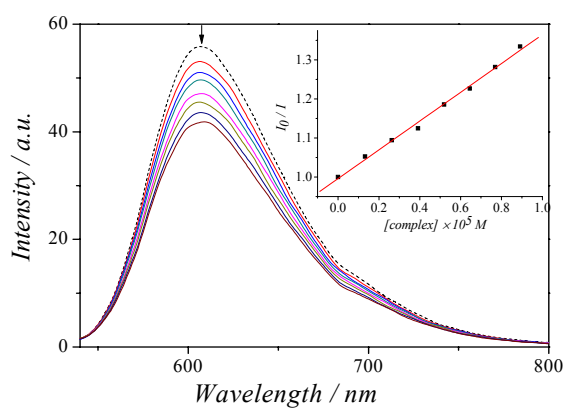

(1)

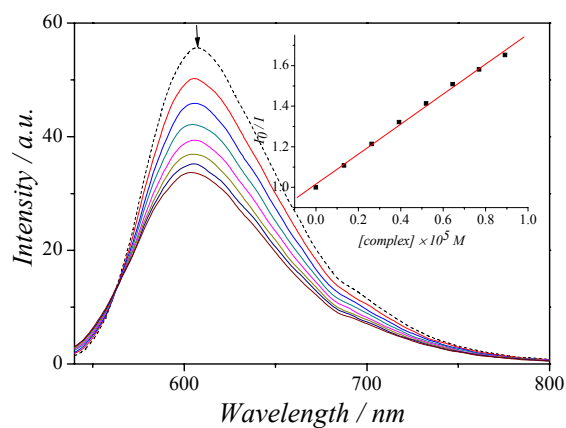

(2)

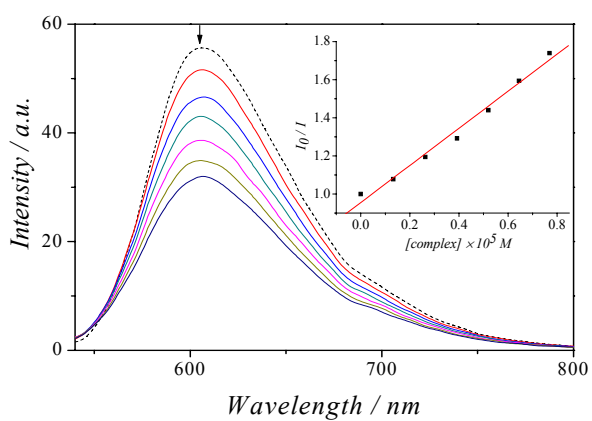

(3)

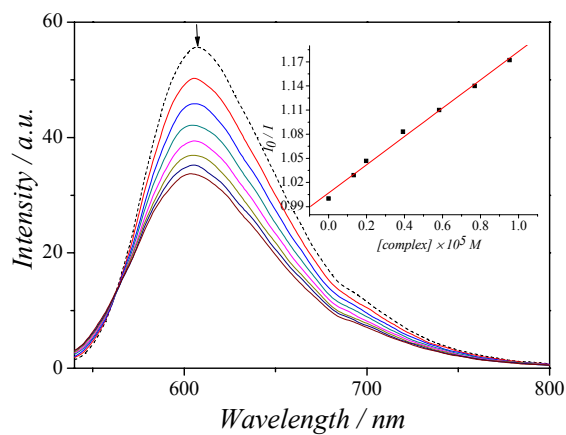

(4)

**Fig. 3S** Fluorescence quenching curves of EB bound to CT-DNA by complexes **1** ( $0-4.46 \times 10^{-5}$  M), **2** ( $0-4.46 \times 10^{-5}$  M), **3** ( $0-3.85 \times 10^{-5}$  M) and **4** ( $0-4.76 \times 10^{-5}$  M). The dash line shows the intensity in the absence of complexes. Inset: Plot of  $I_0 / I$  versus [complex].

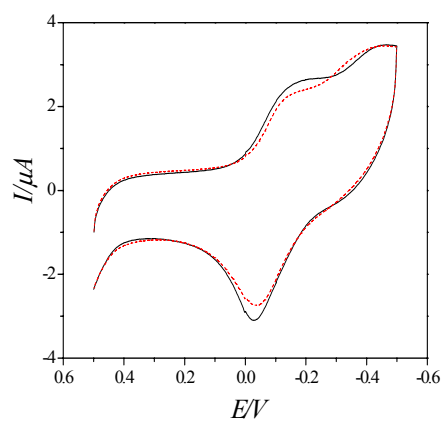

(1)

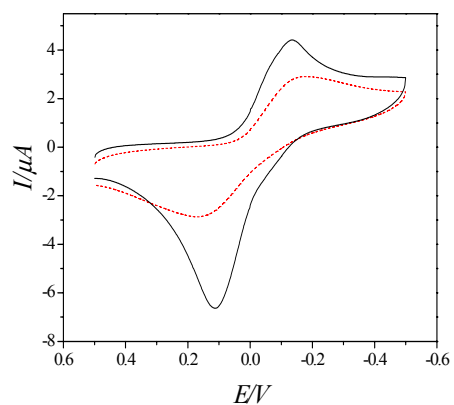

(2)

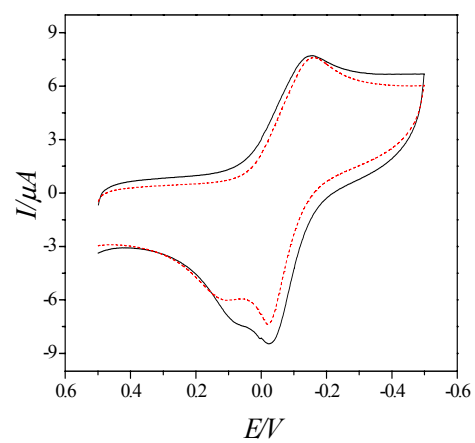

(3)

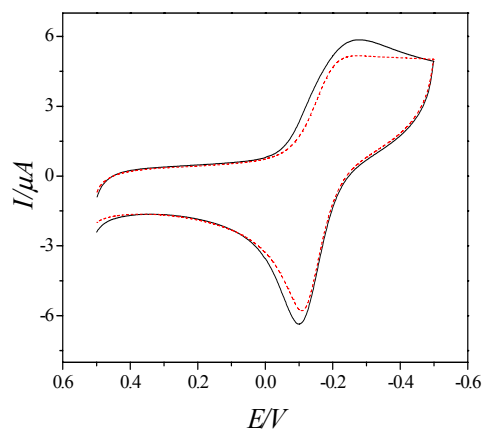

(4)

**Fig. 4S** Cyclic voltammograms of complexes **1**, **2**, **3** and **4** in absence (solid line) and presence (dash line) of CT-DNA in 10 mM Tris-HCl / 50 mM NaCl buffer (pH = 7.2). Scan rate: 100  $\text{mV}\cdot\text{s}^{-1}$ .

**Table 2S** Electrochemical data for complexes **1**, **2**, **3**, **4** in the absence and presence of CT-DNA

| Complex  | $E_{pa}$ (mV) | $E_{pc}$ (mV) | $E_{1/2}$ (mV) | $\Delta E$ (mV)* |
|----------|---------------|---------------|----------------|------------------|
| <b>1</b> | -28, -39      | -160, -137    | -94, -88       | 6.0              |
| <b>2</b> | 113, 166      | -135, -181    | -11, -7.5      | 3.5              |
| <b>3</b> | -24, -20      | -157, -159    | -90.5, -89.5   | 1.0              |
| <b>4</b> | -99, -109     | -281, -268    | -190, -188.5   | 1.5              |

\* $\Delta E$  indicates the positive shifts for the four copper(II) complexes in the absence and presence of CT-DNA.  $\Delta E = (E_{pa} + E_{pc}) / 2$ , where  $E_{pa}$  and  $E_{pc}$  are anodic and cathodic peak potentials.  $\Delta E = E_{pa} - E_{pc}$ ,  $i_{pa}$  and  $i_{pc}$  are anodic and cathodic peak currents.

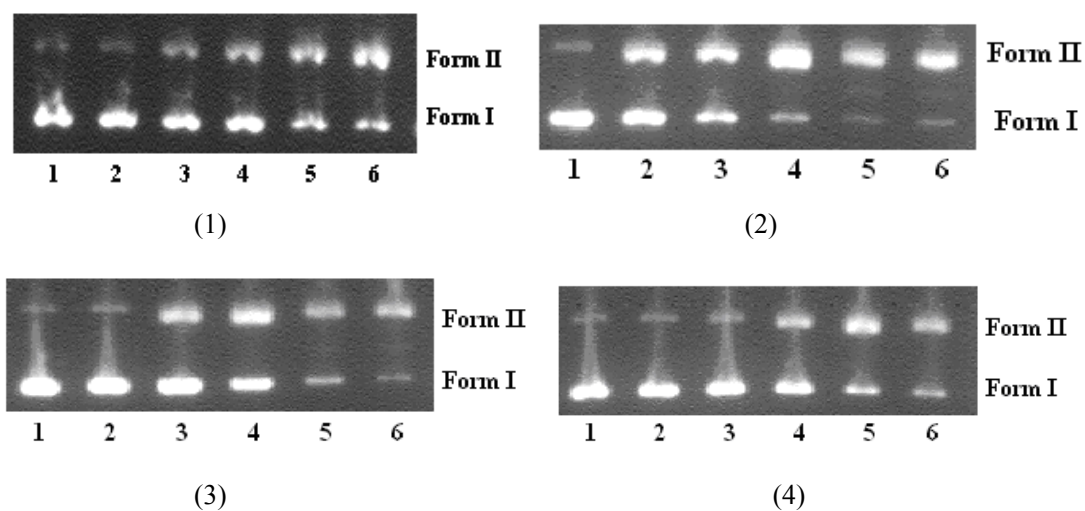

**Fig. 5S** Gel electrophoresis diagrams showing the cleavage of pBR322 DNA ( $0.1 \mu\text{g} / \mu\text{L}$ ) at different complex concentrations in Tris-HCl / NaCl buffer ( $\text{pH} = 7.2$ ) and  $37^\circ\text{C}$  for 3 h. (1) Lane 1: DNA control; Lane 2-6: DNA + **1** (0.005, 0.02, 0.035, 0.1, 0.2 mM), respectively; (2) Lane 1: DNA control; Lane 2-6: DNA + **2** (0.005, 0.02, 0.035, 0.1, 0.15 mM), respectively; (3) Lane 1: DNA control; Lane 2-6: DNA + **3** (0.005, 0.02, 0.035, 0.1, 0.2 mM), respectively; (4) Lane 1: DNA control; Lane 2-6: DNA + **4** (0.005, 0.02, 0.035, 0.1, 0.2 mM), respectively.

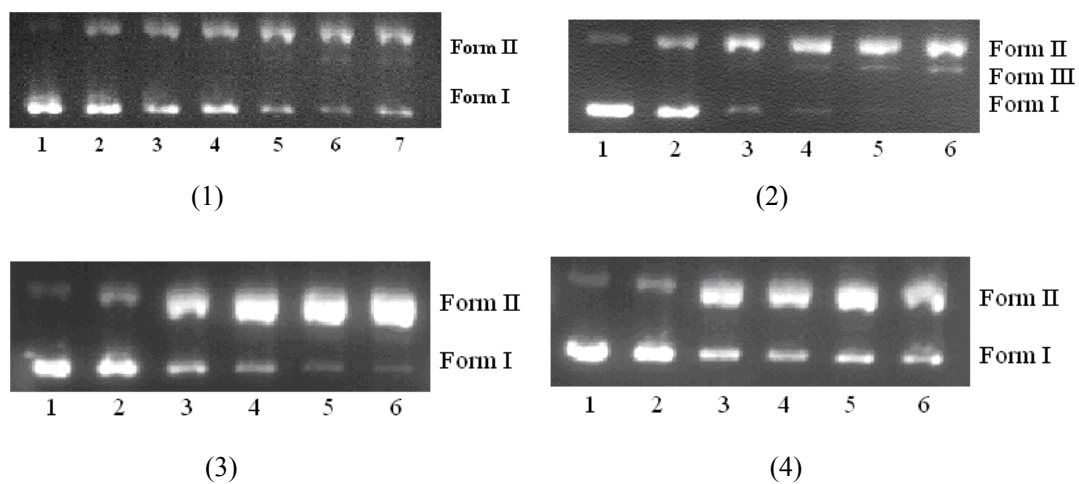

**Fig. 6S** Time-dependence of pBR322 DNA cleavage by complexes in Tris-HCl / NaCl buffer (pH = 7.2) at 37 °C. (1) Lane 1: DNA control (4 h); Lane 2-7: DNA + 0.4 mM **1** (0, 0.5, 1, 2, 3, 4 h), respectively; (2) Lane 1: DNA control (3 h); Lane 2-6 DNA + 0.15 mM **2** (0 h, 0.5 h, 1 h, 2 h, 3 h), respectively; (3) Lane 1: DNA control (3 h); Lane 2-6 DNA + 0.15 mM **3** (0 h, 0.5 h, 1 h, 2 h, 3 h), respectively; (4) Lane 1: DNA control (3 h); Lane 2-6 DNA + 0.1 mM **4** (0 h, 0.5 h, 1 h, 2 h, 3 h), respectively.

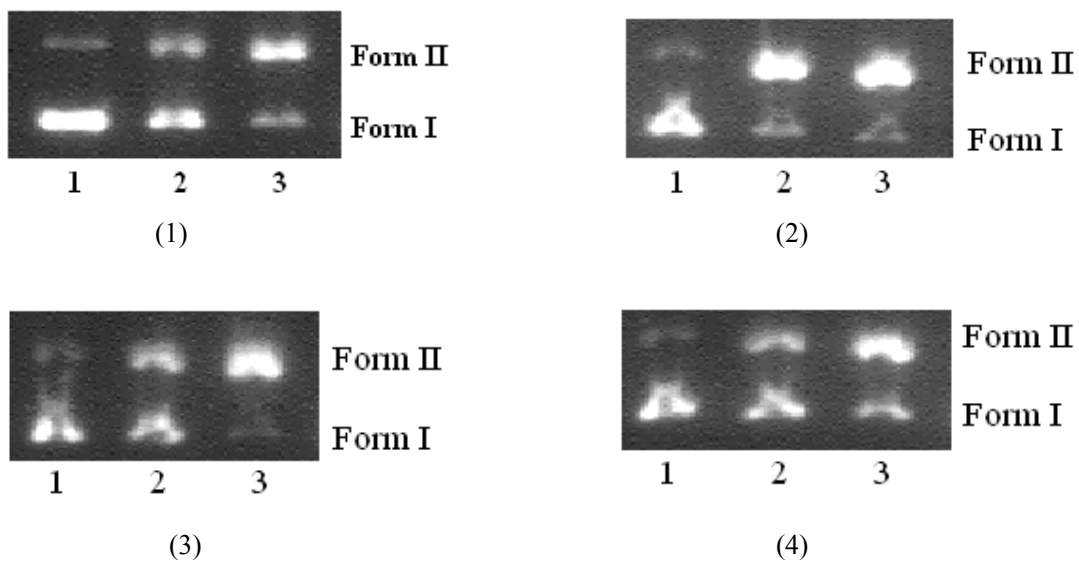

**Fig. 7S** Cleavage of pBR322 DNA (0.1 $\mu$ g /  $\mu$ L) at room temperature for 3 h. (1) Lane 1: DNA control; Lane 2: DNA + 0.4 mM **1** in nitrogen atmosphere; Lane 3: DNA + 0.4 mM **1** in air; (2) Lane 1: DNA control; Lane 2: DNA + 0.035 mM **2** in N<sub>2</sub> atmosphere; Lane 3: DNA + 0.035 mM **2** in air; (3) Lane 1: DNA control; Lane 2: DNA + 0.05 mM **3** in N<sub>2</sub> atmosphere; Lane 3: DNA + 0.05 mM **3** in air; (4) Lane 1: DNA control; Lane 2: DNA + 0.05 mM **4** in N<sub>2</sub> atmosphere; Lane 3: DNA + 0.05 mM **4** in air.



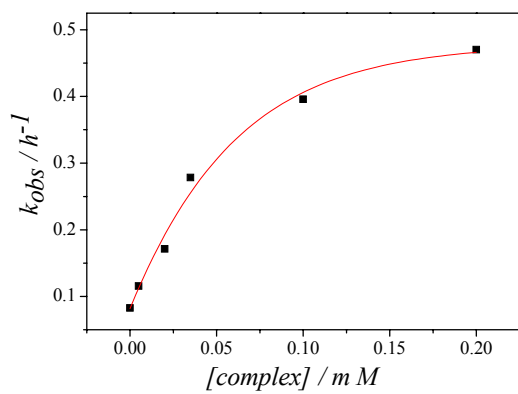

(1)

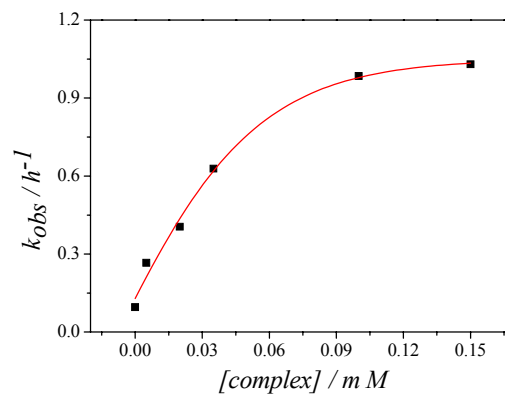

(2)

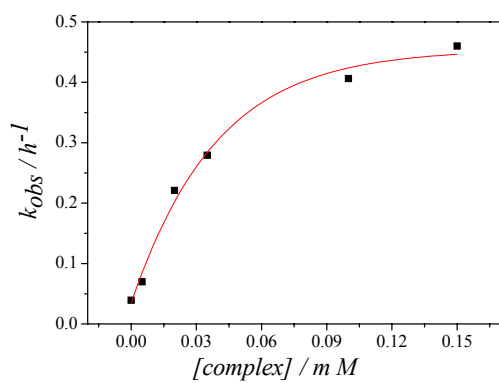

(3)

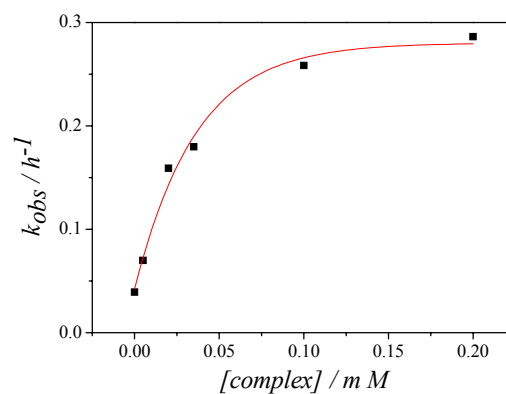

(4)

**Fig. 8S** Kinetics for the cleavage of plasmid pBR322 DNA by **1**, **2**, **3** and **4** in Tris-HCl / NaCl buffer (pH = 7.2) at 37 °C for 3h.
